# Supplementary material
Source: PubMed Central journal article supplement (PMC8210475)
Supplement: NIHMS1711391-supplement-1.pdf [file NIHMS1711391-supplement-1.pdf]

**Supplementary Table 1.** Characteristics of Survey Respondents vs Nonrespondents

|                                         | Respondents (n = 1020) | Nonrespondents (n = 1851) | P value |
|-----------------------------------------|------------------------|---------------------------|---------|
| Age                                     |                        |                           | .415    |
| 21–50 y                                 | 143 (14.0)             | 273 (14.8)                |         |
| 51–60 y                                 | 334 (32.7)             | 638 (34.6)                |         |
| 61–90 y                                 | 543 (53.2)             | 935 (50.7)                |         |
| Male                                    | 649 (63.6)             | 1293 (70.0)               | .001    |
| Race/ethnicity                          |                        |                           | .001    |
| Non-Hispanic White                      | 359 (35.2)             | 773 (42.0)                |         |
| Non-Hispanic Black                      | 292 (28.6)             | 507 (27.5)                |         |
| Hispanic                                | 341 (33.4)             | 506 (27.5)                |         |
| Other                                   | 28 (2.7)               | 55 (3.0)                  |         |
| Etiology of liver disease               |                        |                           | .216    |
| Hepatitis C virus                       | 603 (59.1)             | 1023 (55.3)               |         |
| Alcohol related                         | 179 (17.5)             | 351 (19.0)                |         |
| Nonalcoholic steatohepatitis            | 136 (13.3)             | 281 (15.2)                |         |
| Hepatitis B virus                       | 28 (2.7)               | 41 (2.2)                  |         |
| Other                                   | 74 (7.3)               | 155 (8.4)                 |         |
| Child-Turcotte-Pugh class A             | 754 (73.9)             | 1287 (69.5)               | .021    |
| CirCom score <sup>a</sup>               |                        |                           | .729    |
| 0                                       | 352 (34.5)             | 618 (33.4)                |         |
| 1                                       | 285 (27.9)             | 499 (27.0)                |         |
| 2                                       | 173 (17.0)             | 326 (17.6)                |         |
| 3                                       | 38 (3.7)               | 86 (4.7)                  |         |
| 4                                       | 172 (16.9)             | 322 (17.4)                |         |
| Receipt of hepatology care <sup>a</sup> | 694 (68.0)             | 873 (47.2)                | <.0001  |

NOTE. Values are n (%).

CirCom, cirrhosis comorbidity.

<sup>a</sup>During year prior to randomization.**Supplemental Table 2.** Prevalence of Depression and Anxiety, Stratified by Child-Turcotte-Pugh Class

|                                           | Parkland   | UTSW       | MEDVAMC    | P value |
|-------------------------------------------|------------|------------|------------|---------|
| Child-Turcotte-Pugh class A cirrhosis     |            |            |            |         |
| <b>Depression measured by PHQ-9 score</b> |            |            |            |         |
| No-minimal depression (0–4)               | 173 (39.1) | 60 (47.62) | 72 (38.92) | .09     |
| Mild depression (5–9)                     | 104 (23.5) | 37 (29.37) | 48 (25.95) |         |
| Moderate depression (10–14)               | 96 (21.7)  | 22 (17.46) | 37 (19.46) |         |
| Moderately severe depression (15–19)      | 52 (11.7)  | 5 (3.97)   | 18 (9.73)  |         |
| Severe depression (20–25)                 | 18 (4.1)   | 2 (1.59)   | 11 (5.95)  |         |
| <b>Anxiety measured by STAI score</b>     |            |            |            |         |
| Mild anxiety (<40)                        | 245 (55.3) | 76 (60.3)  | 128 (69.2) | .005    |
| Moderate–severe anxiety (≥40)             | 198 (44.7) | 50 (39.7)  | 57 (30.8)  |         |
| Child Pugh Turcotte class B–C cirrhosis   |            |            |            |         |
| <b>Depression measured by PHQ-9 score</b> |            |            |            |         |
| No-minimal depression (0–4)               | 65 (35)    | 12 (41.4)  | 14 (27.5)  | .80     |
| Mild depression (5–9)                     | 49 (26.3)  | 8 (27.6)   | 16 (31.4)  |         |
| Moderate depression (10–14)               | 33 (17.7)  | 6 (20.7)   | 10 (19.6)  |         |
| Moderately severe depression (15–19)      | 30 (16.1)  | 3 (10.3)   | 7 (13.7)   |         |
| Severe depression (20–25)                 | 9 (4.8)    | 0 (0)      | 4 (7.8)    |         |
| <b>Anxiety measured by STAI score</b>     |            |            |            |         |
| Mild anxiety (<40)                        | 90 (48.4)  | 19 (65.5)  | 28 (54.9)  | .20     |
| Moderate–severe anxiety (≥40)             | 96 (51.6)  | 10 (34.5)  | 23 (45.1)  |         |

NOTE. Values are n (%).

MEDVAMC, Michael E. DeBakey VA Medical Center; PHQ-9, Patient Health Questionnaire-9; STAI, State-Trait Anxiety Inventory; UTSW, University of Texas Southwestern Medical Center.
